# Supplementary material
Source: Elsevier journal article supplement (https://www.sciencedirect.com/science/article/pii/S2605153219302493)

# **Prognostic impact of pericardial drainage and anti-inflammatory drug treatment in severe idiopathic pericardial effusion**

## **Supplementary data**

**Table 1 of the supplementary data. Univariate and multivariate analysis to predict echocardiographic signs of haemodynamic compromise**

|                                                 | Haemodynamic compromise |           |      |              |           |      |
|-------------------------------------------------|-------------------------|-----------|------|--------------|-----------|------|
|                                                 | Univariate              |           |      | Multivariate |           |      |
|                                                 | HR                      | 95%CI     | P    | HR           | 95%CI     | P    |
| Age (by 1 year increment)                       | 0.99                    | 0.97-1.01 | .380 |              |           |      |
| Sex (Male)                                      | 1.14                    | 0.59-2.21 | .690 |              |           |      |
| Smoking habit                                   | 1.55                    | 0.52-4.66 | .434 |              |           |      |
| Anticoagulation                                 | 0.88                    | 0.37-2.06 | .768 |              |           |      |
| Fever                                           | 1.44                    | 0.68-3.04 | .336 |              |           |      |
| Maximum diameter (by 1 mm increment)            | 1.06                    | 1.02-1.09 | .002 | 1.05         | 1.02-1.09 | .004 |
| Type of effusion (loculated Vs circumferential) | 0.47                    | 0.22-1.04 | .062 | 0.58         | 0.25-1.31 | .190 |
| Creatinin (by 1 mg/dl increment)                | 0.94                    | 0.61-1.46 | .787 |              |           |      |
| Charlson score index (by 1 point increment)     | 0.93                    | 0.82-1.06 | .271 |              |           |      |

**Table 2 of the supplementary data. Causes of death in the population of patients with severe idiopathic pericardial effusion at 2-years of follow-up.**

| Cause of death  | N = 33    |
|-----------------|-----------|
| Cardiac death   | 10 (30.3) |
| Cerebrovascular | 1 (3.0)   |
| Oncological     | 2 (6.1)   |
| Infectious      | 6 (18.2)  |
| Other causes    | 3 (9.1)   |
| Unknown         | 11 (33.3) |

Data are expressed as no. (%).

**Table 3 of the supplementary data. Causes of death of patients who received / did not received anti-inflammatory drugs at 2-years of follow-up.**

| Cause of death  | Treated with anti-inflammatory drugs<br>(n = 4) | Not treated with anti-inflammatory drugs<br>(n = 29) |
|-----------------|-------------------------------------------------|------------------------------------------------------|
| Cardiac death   | 1 (25.0)                                        | 9 (31.0)                                             |
| Cerebrovascular | 1 (25.0)                                        | 0 (0.0)                                              |
| Oncological     | 2 (50.0)                                        | 0 (0.0)                                              |
| Infectious      | 0 (0.0)                                         | 6 (20.7)                                             |
| Other causes    | 0 (0.0)                                         | 3 (10.3)                                             |
| Unknown         | 0 (0.0)                                         | 11 (37.9)                                            |

Data are expressed as no. (%).

**Figure 1 of the supplementary data - Kaplan Meier survival analysis in 94 patients with idiopathic severe pericardial effusion without echocardiographic signs of haemodynamic compromise, stratified by anti-inflammatory drugs (AD) treatment. Four therapeutic alternatives are represented: drainage and AD treatment (solid red line), drainage and no AD treatment (dashed red line), no drainage and AD treatment (solid blue line) and no drainage/no AD treatment (dashed blue line).**

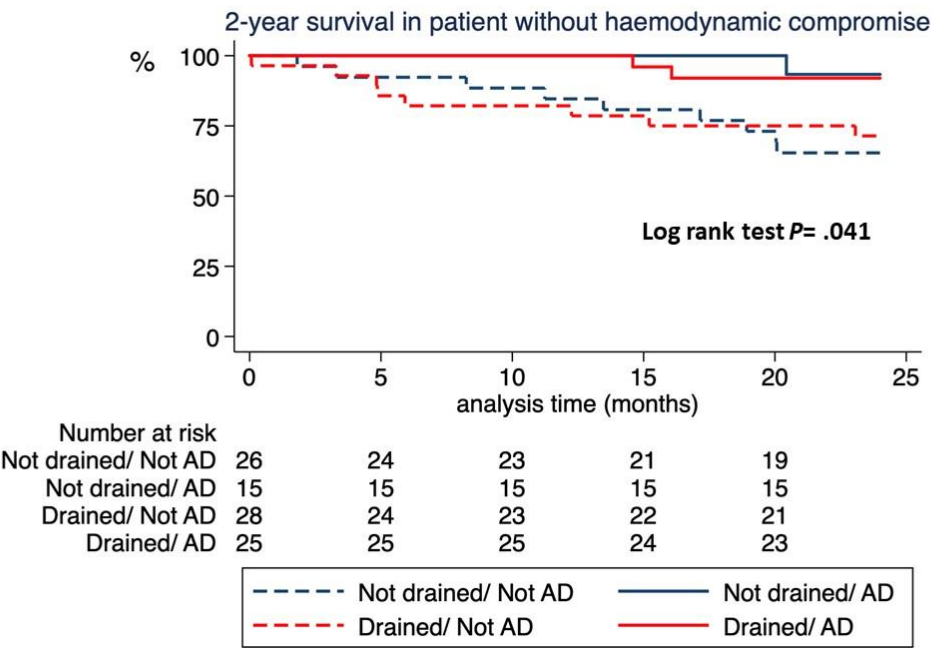

Supplement: mmc1 [file S2605153219302493:mmc1.pdf]
